# Supplementary material for: PHB2 ameliorates Doxorubicin-induced cardiomyopathy through interaction with NDUFV2 and restoration of mitochondrial complex I function
Source: PubMed Central journal article supplement — Redox Biol. 2023 Jul 12;65:102812. doi: 10.1016/j.redox.2023.102812 (PMC10366351; doi:10.1016/j.redox.2023.102812), 2023-07-12

**Figure 1B**

**PHB2**

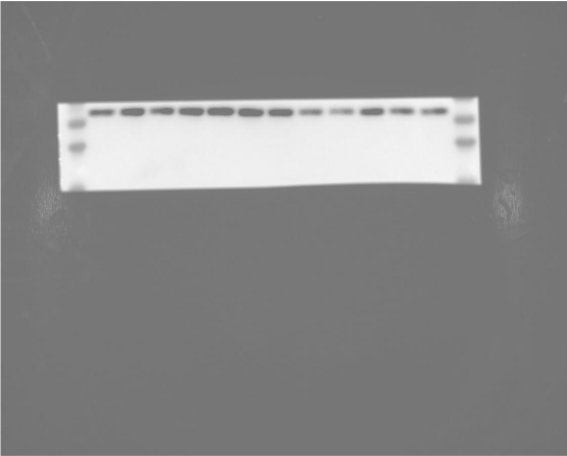

**Tubulin**

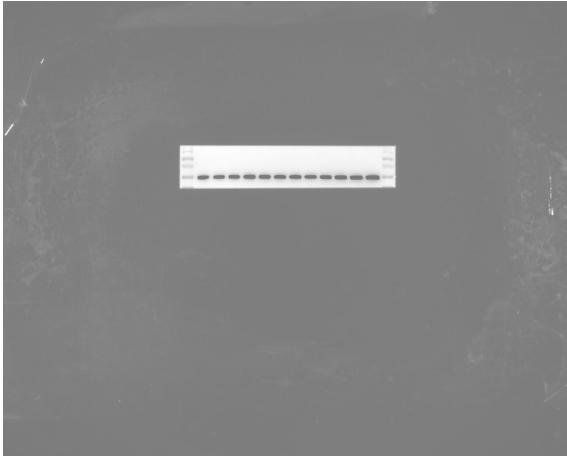

**Figure 1E**

**PHB2**

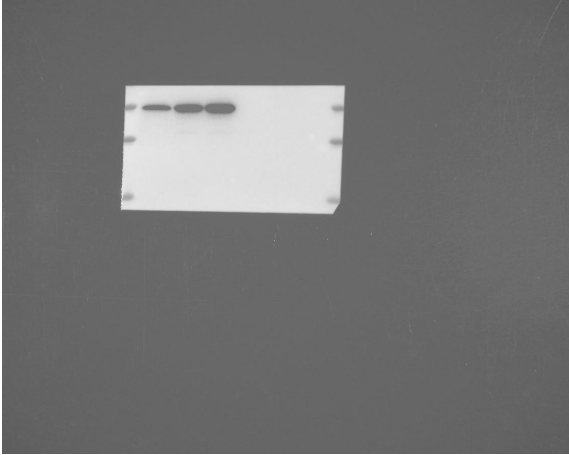

**Tubulin**

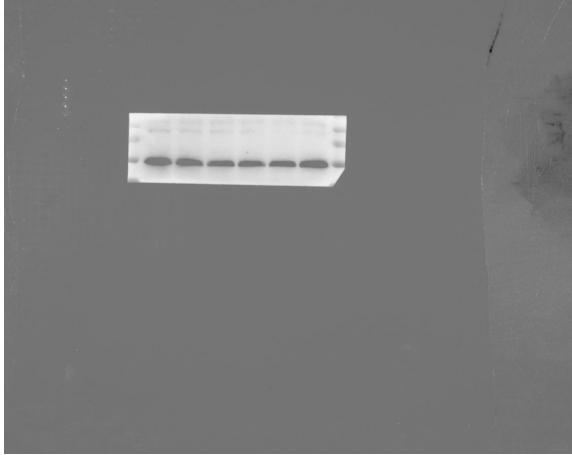

**Figure 2A**

**PHB2**

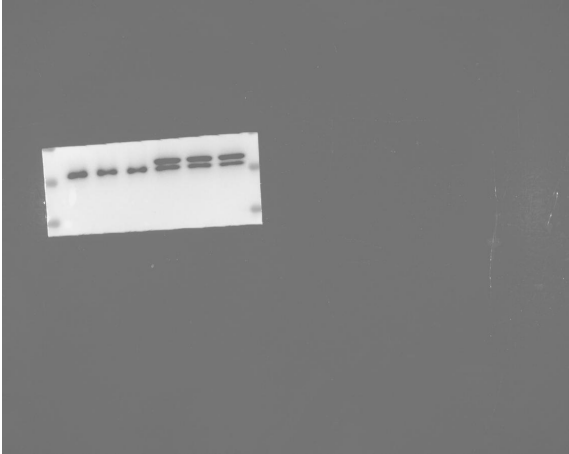

**Tubulin**

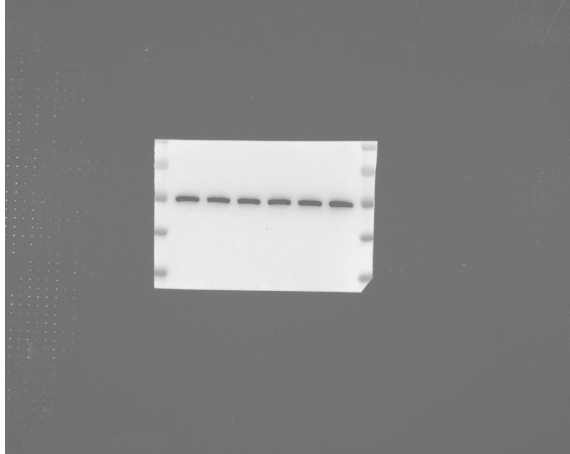

**Figure 3C**

**FIS1\_gel 1**

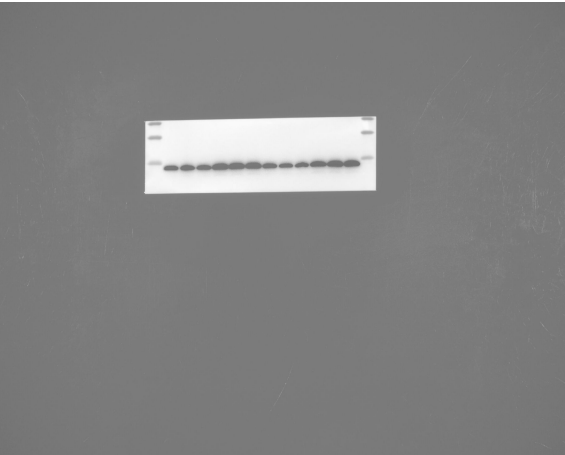

**FIS1\_Tubulin\_gel 1**

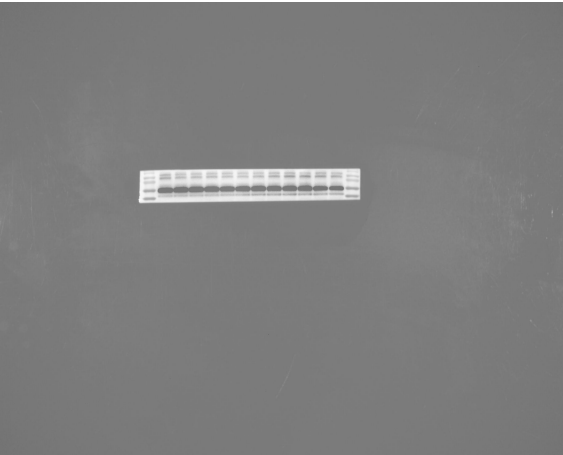

**OPA1\_gel 1**

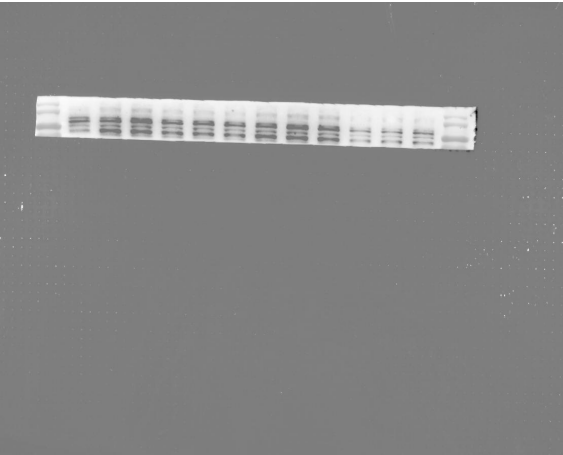

**OPA1\_Tubulin\_gel 1**

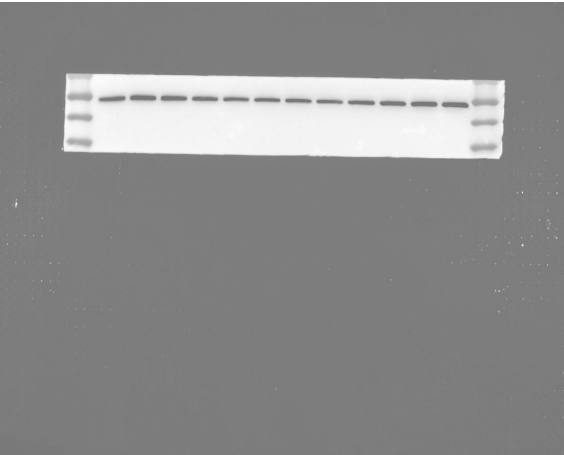

**MFN2\_gel 1**

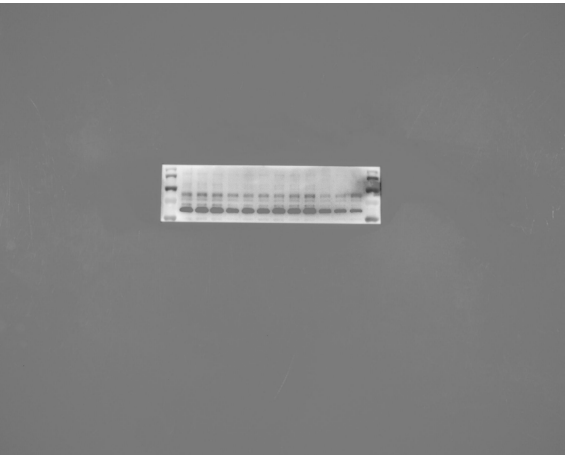

**MFN2\_Tubulin\_gel 1**

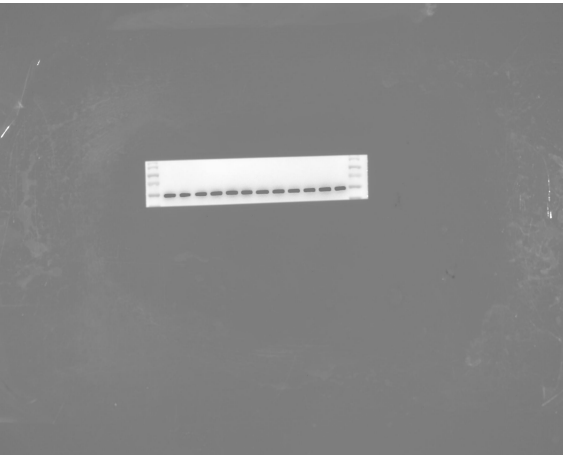

**Figure 3C**

**FIS1\_gel 2**

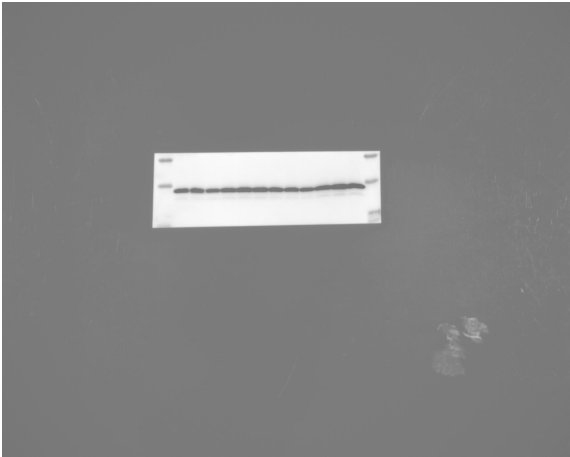

**OPA1\_gel 2**

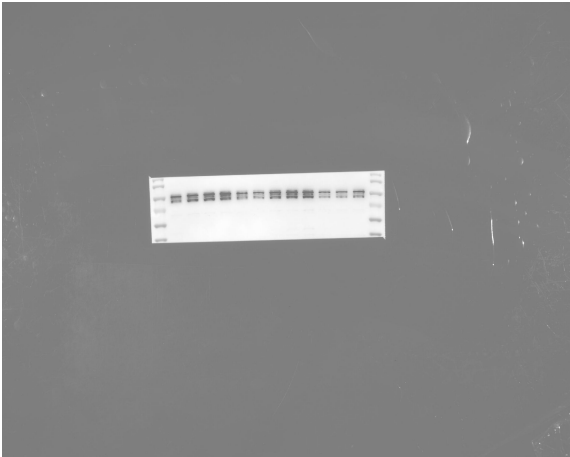

**MFN2\_gel 2**

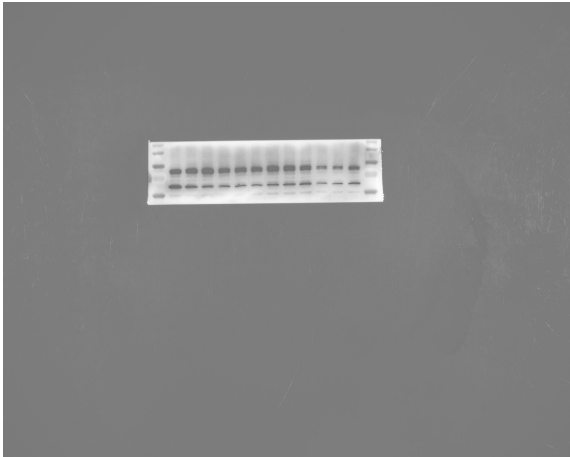

**Tubulin\_gel 2**

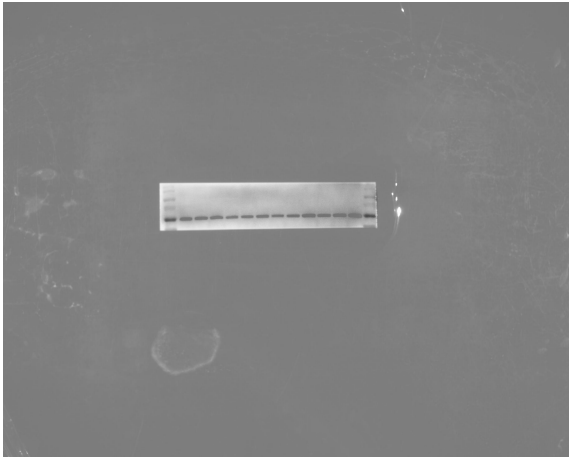

**Figure 3G**

**FIS1\_gel 1**

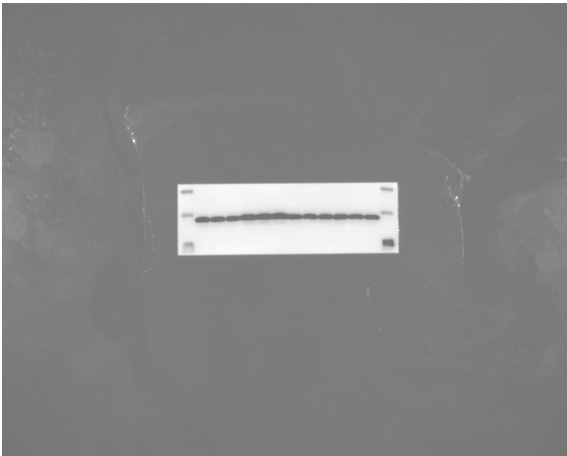

**GAPDH\_FIS1\_gel 1**

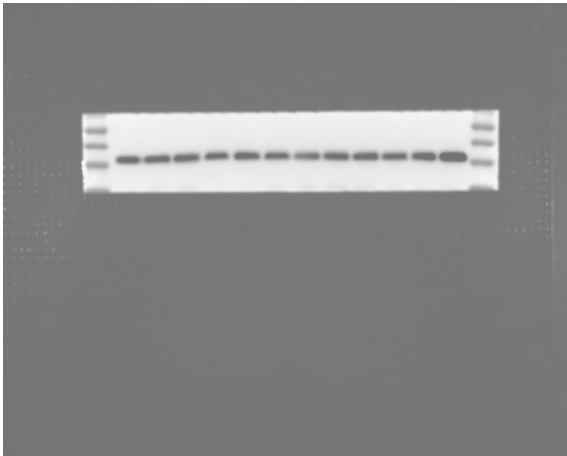

**OPA1\_gel 1**

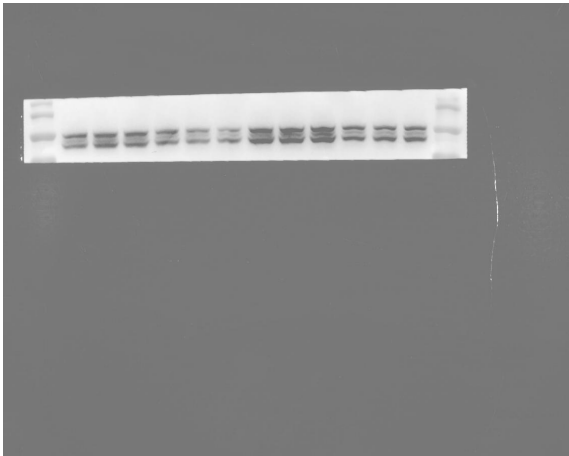

**Tubulin\_OPA1\_gel 1**

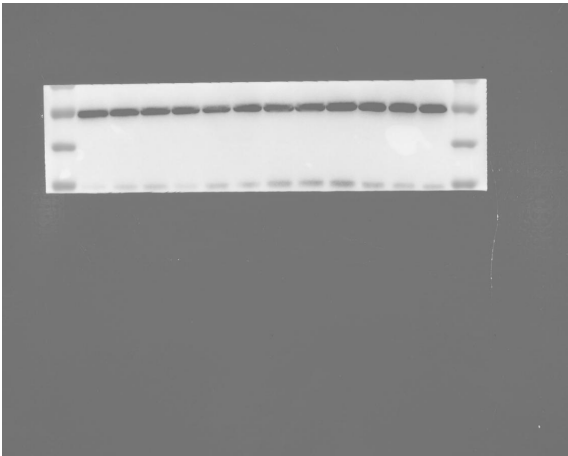

**MFN2\_gel 1**

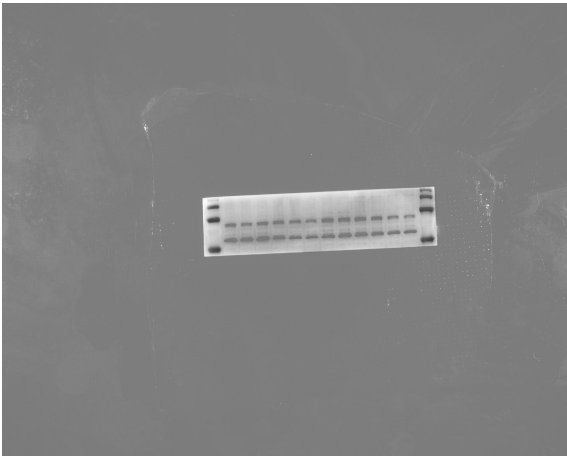

**Tubulin\_MFN2\_gel 1**

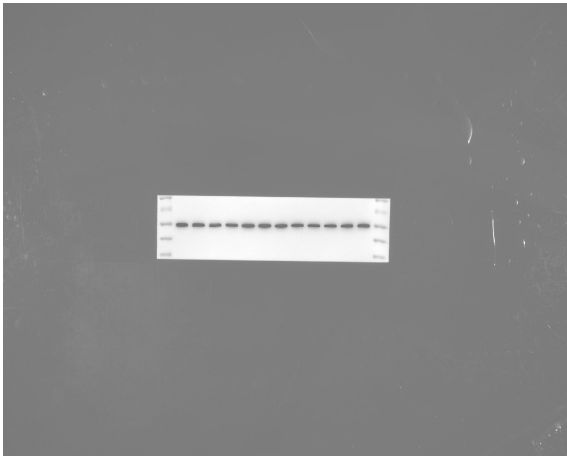

**Figure 3G**

**FIS1\_gel 2**

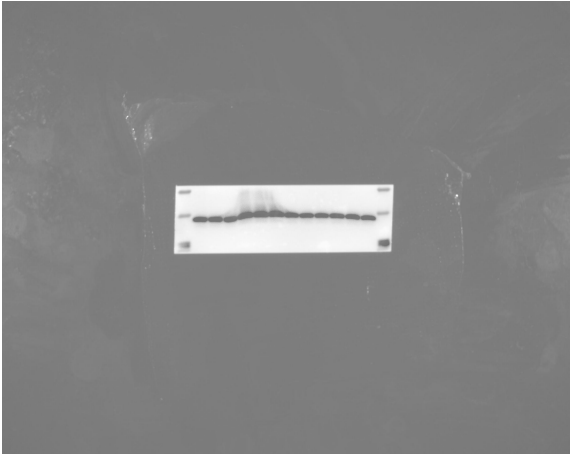

**OPA1\_gel 2**

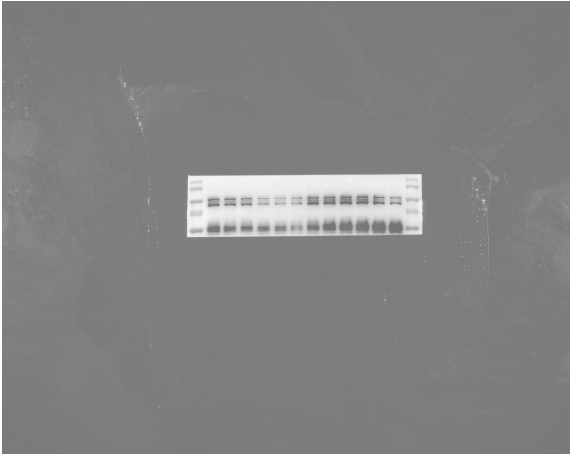

**MFN2\_gel 2**

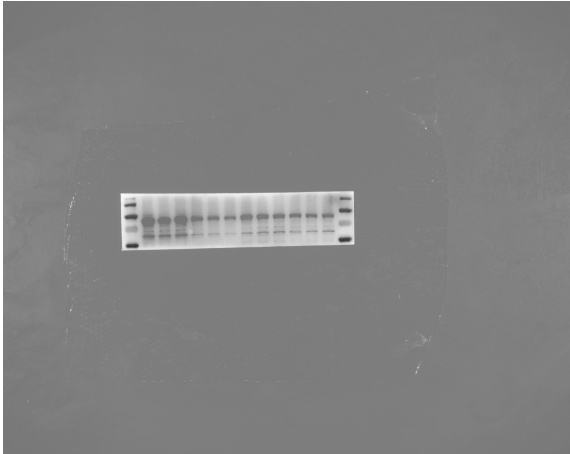

**Tubulin\_gel 2**

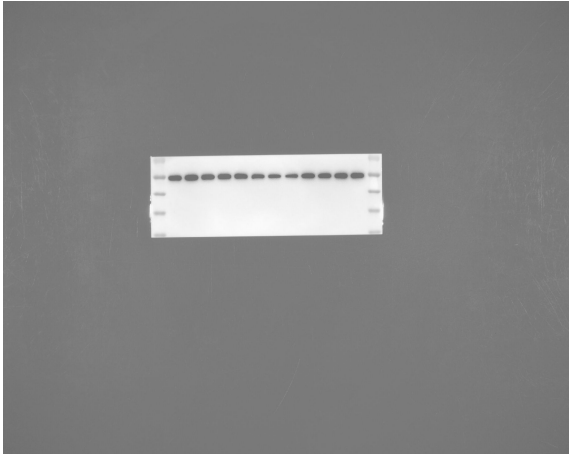

**Figure 3I**

**PHB2**

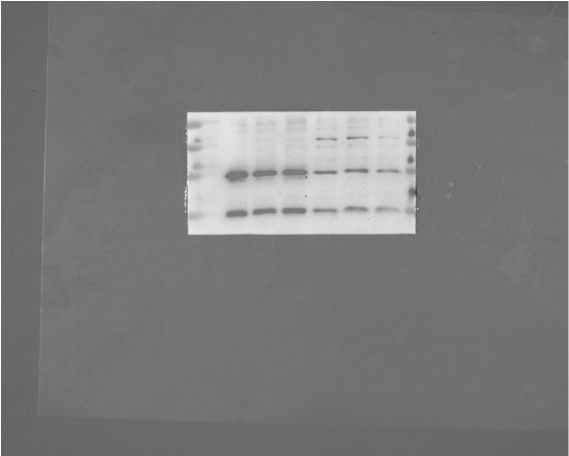

**Tubulin**

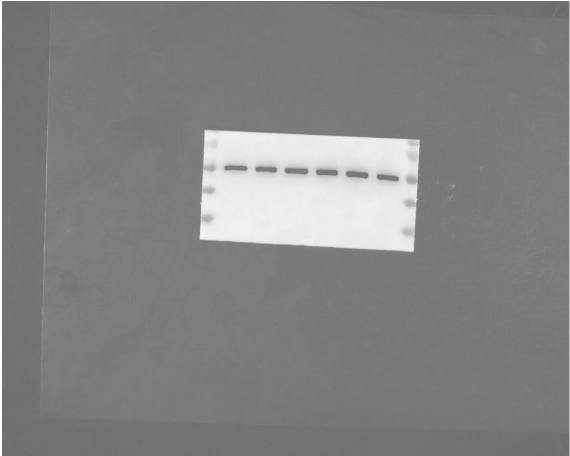



**Figure 3L**

**FIS1\_gel 1**

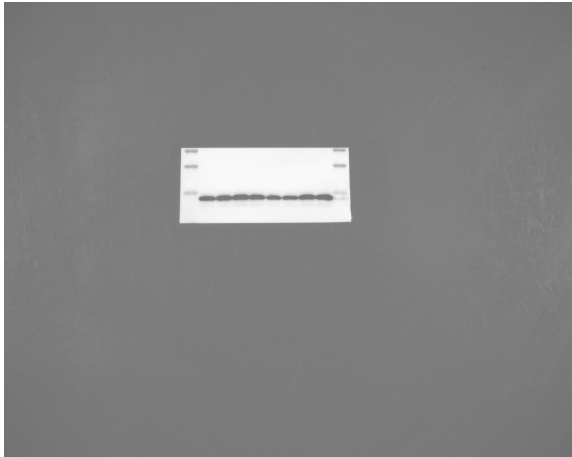

**Tubulin\_FIS1\_gel 1**

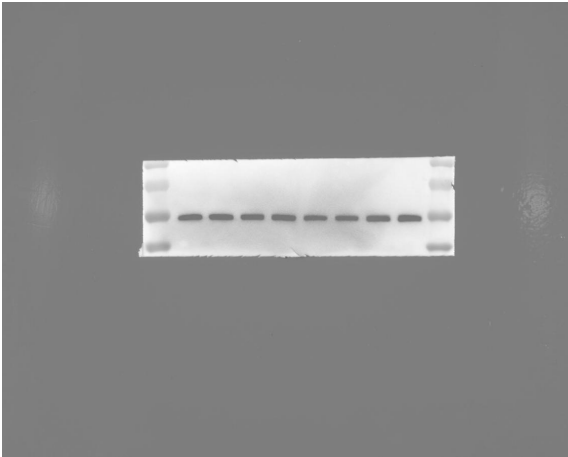

**OPA1\_gel 1**

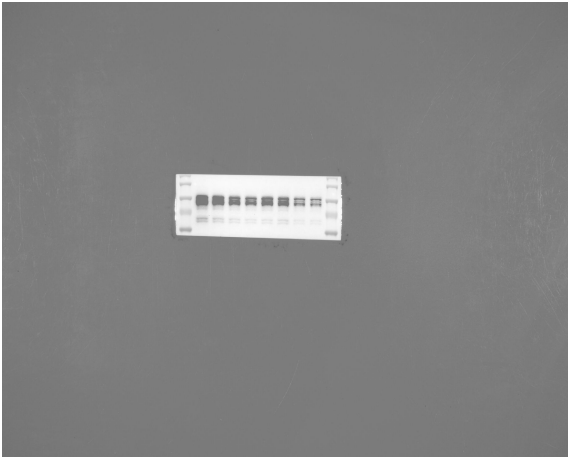

**Tubulin\_OPA1\_gel 1**

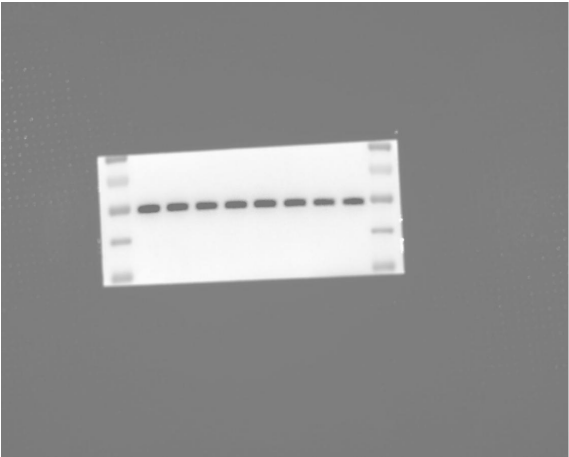

**MFN2\_gel 1**

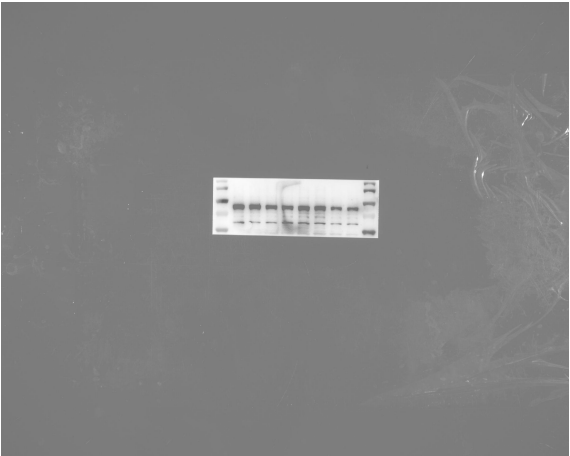

**Tubulin\_MFN2\_gel 1**

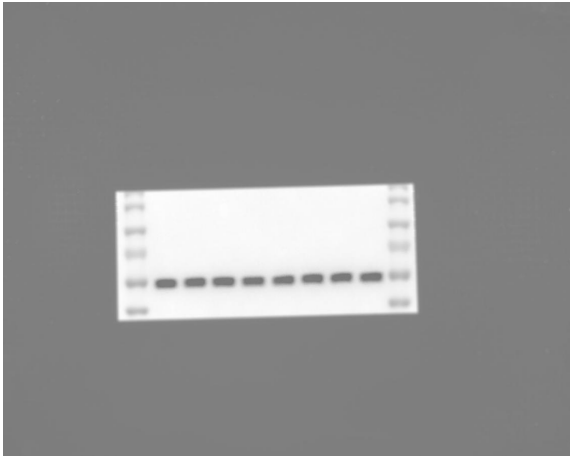

**Figure 3L**

**FIS1\_gel 2**

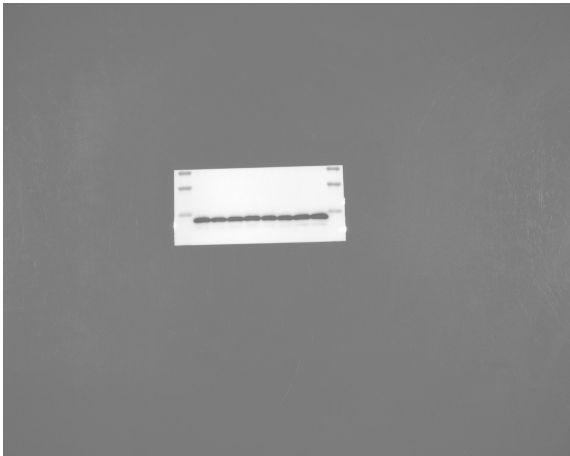

**OPA1\_gel 2**

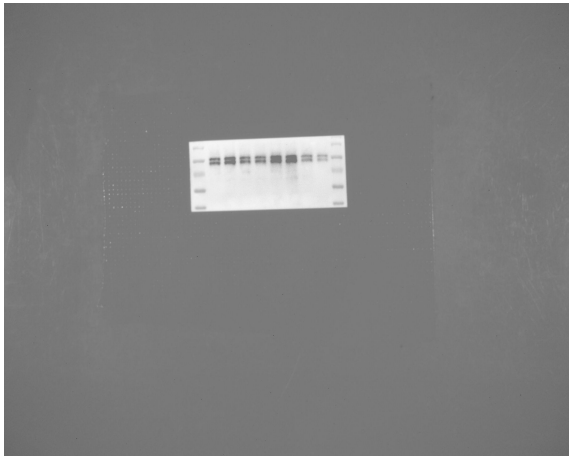

**MFN2\_gel 2**

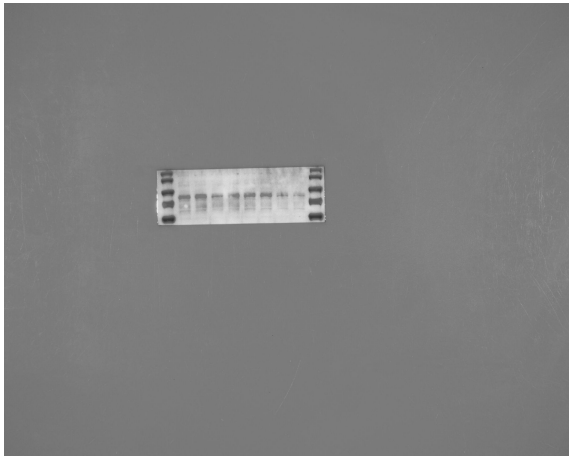

**Tubulin\_gel 2**

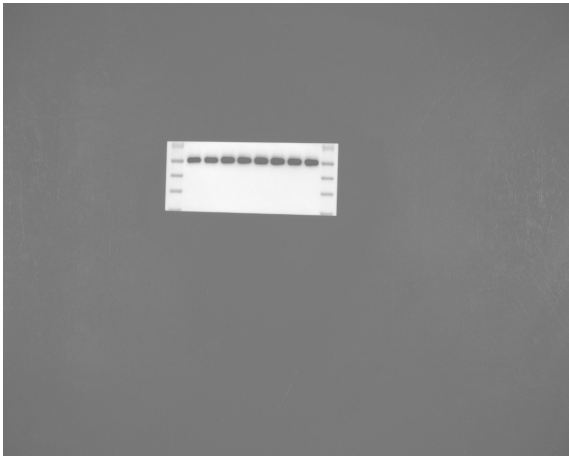

**Figure 4E**

**OXPPOS\_gel 1**

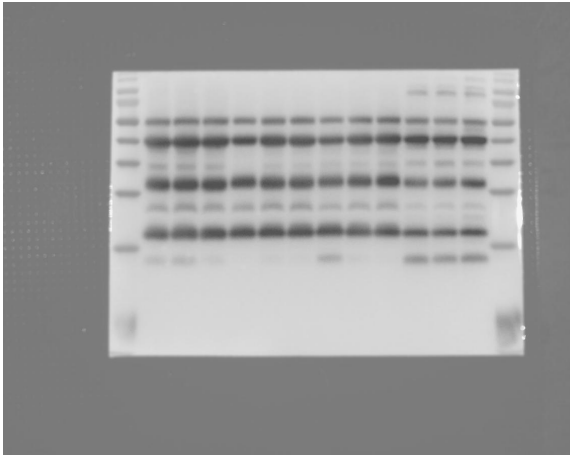

**Tubulin\_gel 1**

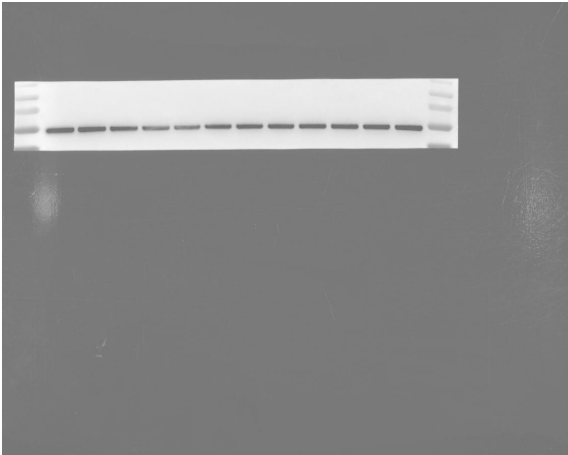

**OXPPOS\_gel 2**

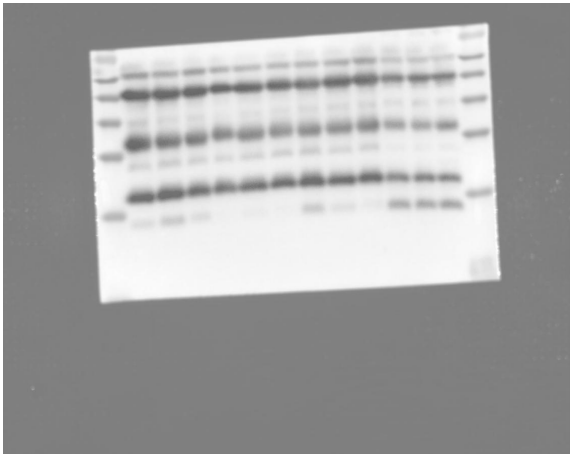

**GAPDH\_gel 2**

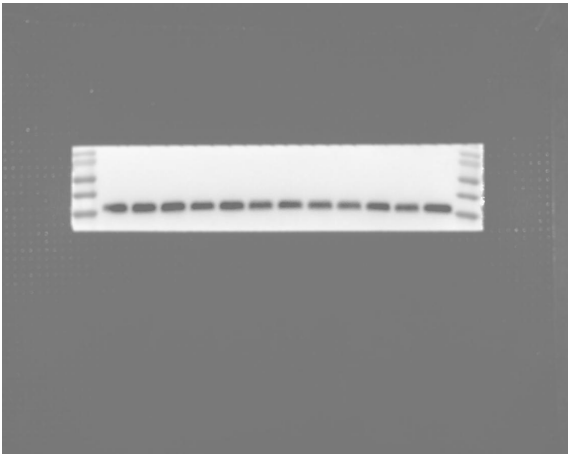

**Figure 6B**

**Mouse heart**

IP NDUFV2\_IB NDUFV2

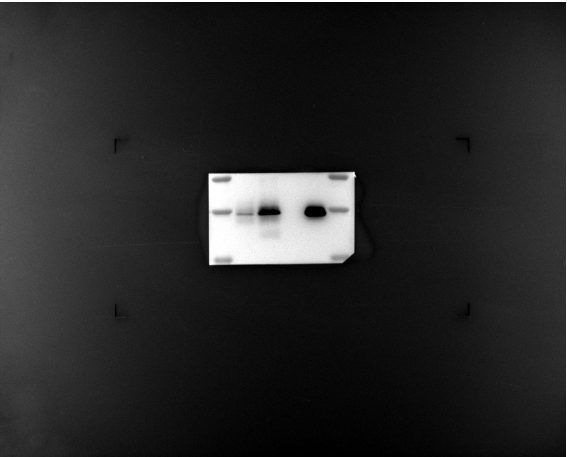

IP NDUFV2\_IB PHB2

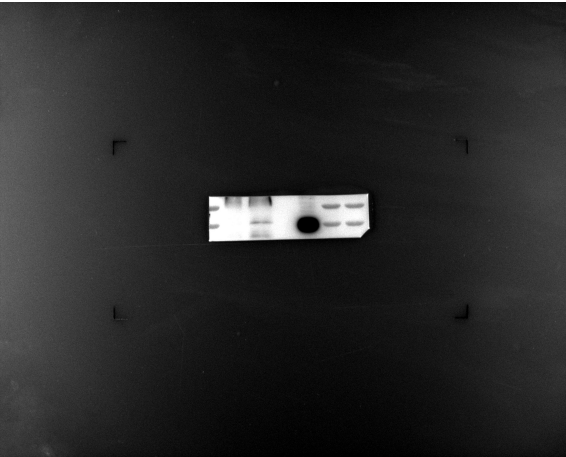

IP PHB2\_IB NDUFV2

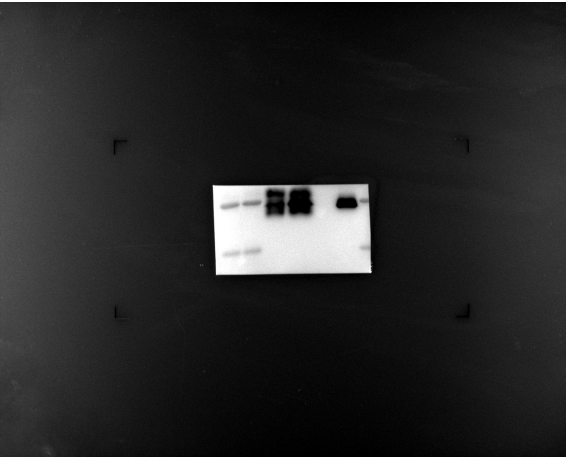

IP PHB2\_IB PHB2

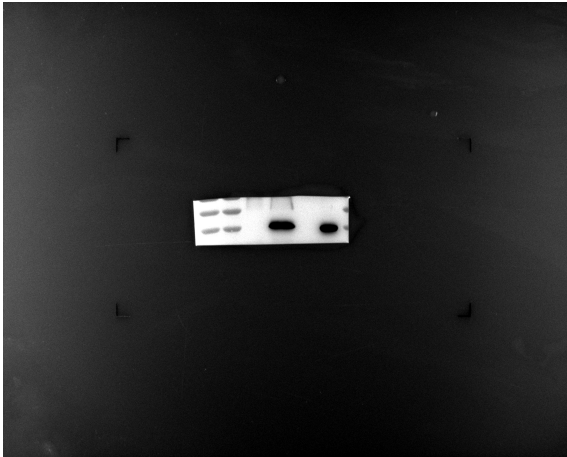

**NRCM**

IP NDUFV2\_IB NDUFV2

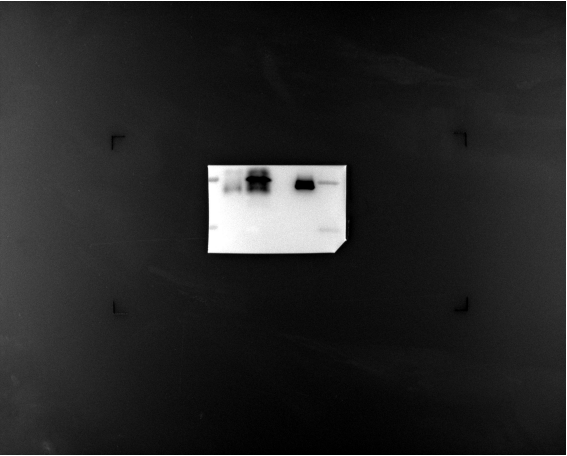

IP NDUFV2\_IB PHB2

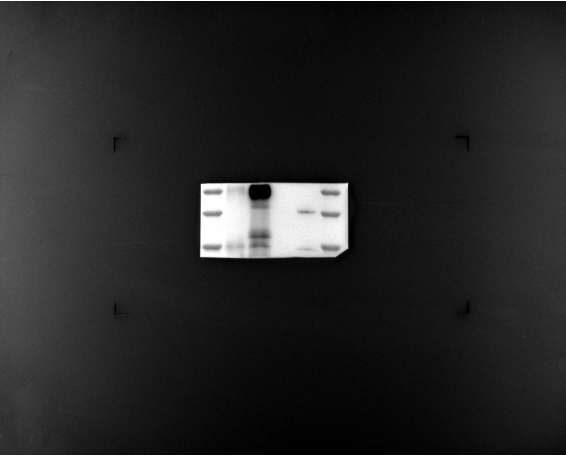

IP PHB2\_IB NDUFV2

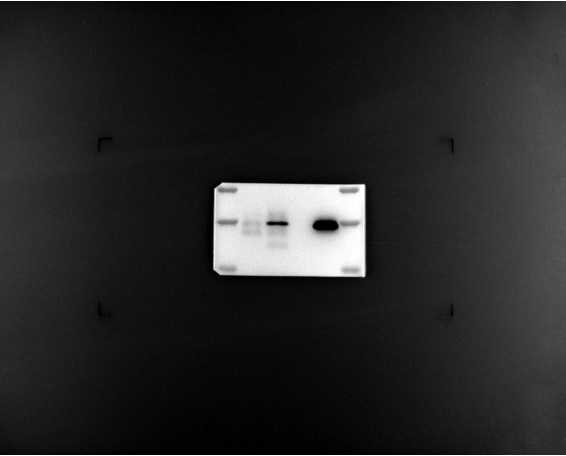

IP PHB2\_IB PHB2

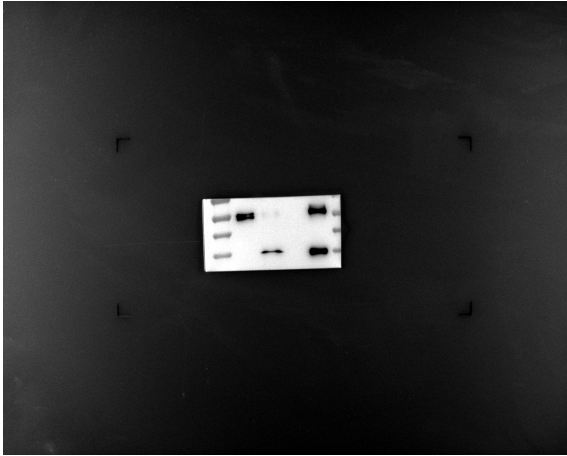

Figure 6C

GST

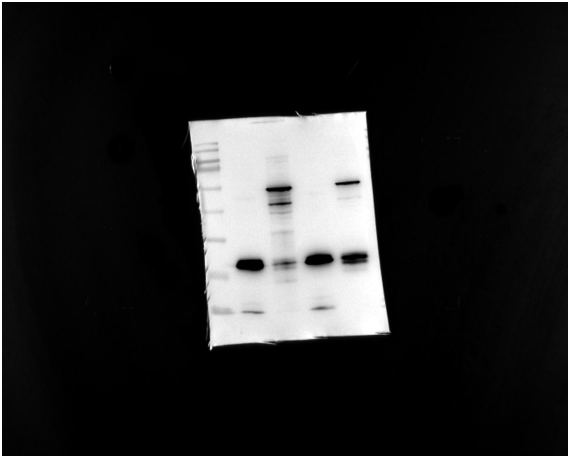

His

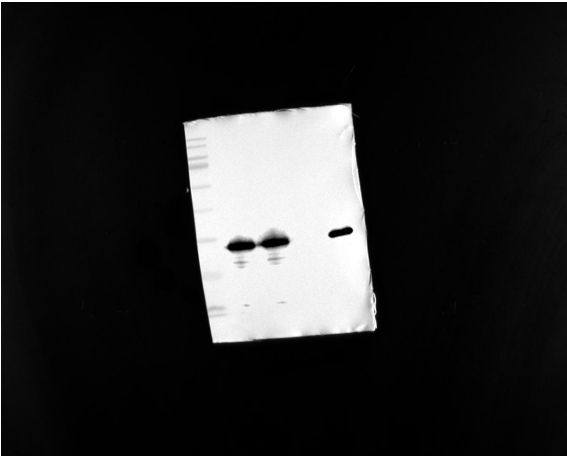

**Figure 6G**

**Left**

input\_Flag

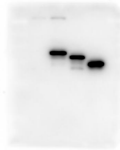

input\_HA

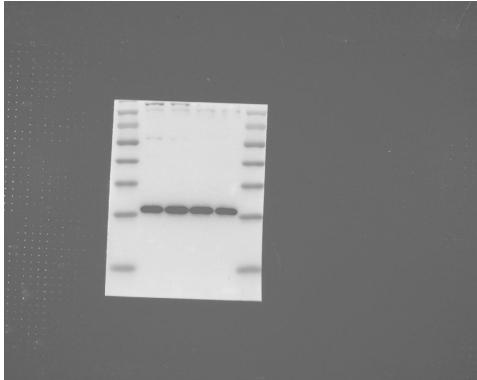

input\_Tubulin

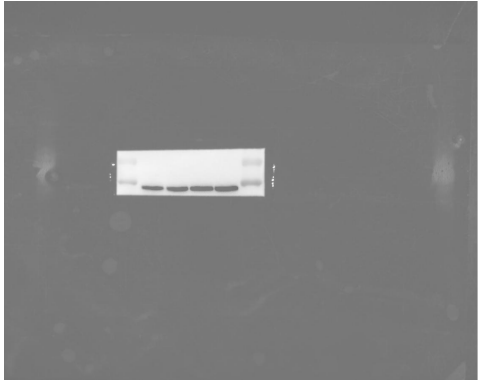

IP\_Flag

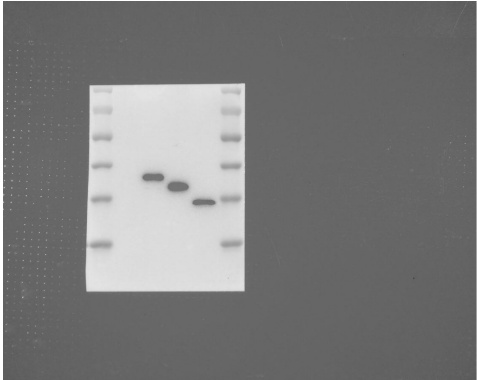

IP\_HA

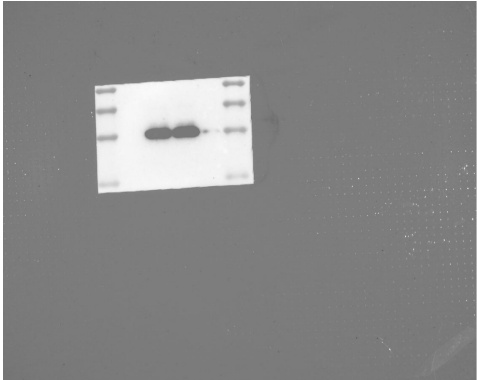

**Right**

input\_Flag

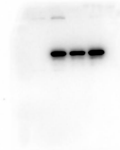

input\_HA

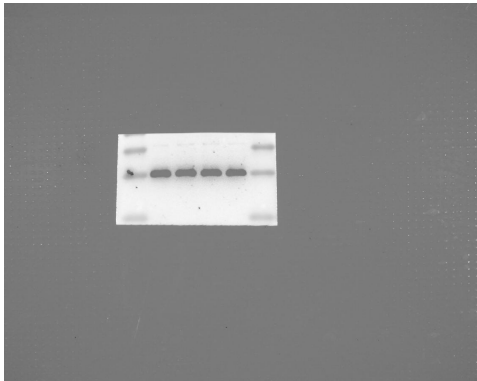

input\_Tubulin

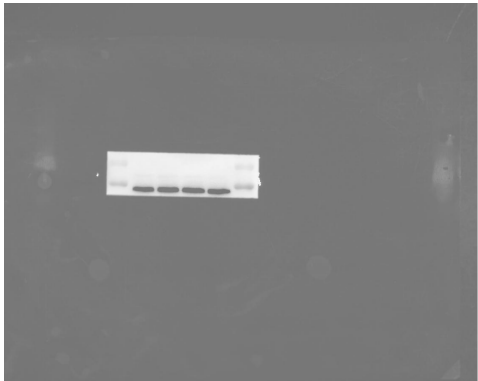

IP\_Flag

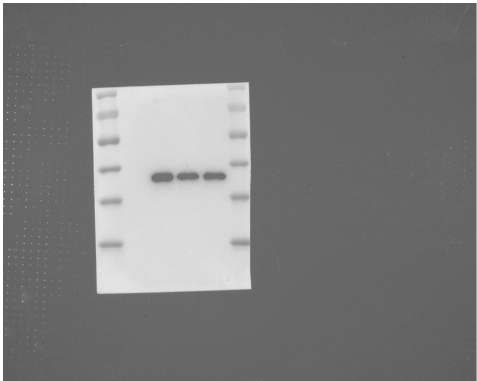

IP\_HA

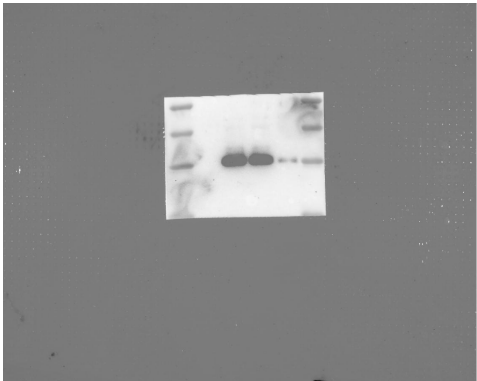

**Figure 6H**

**Mouse heart**

**NDUFV2\_gel 1**

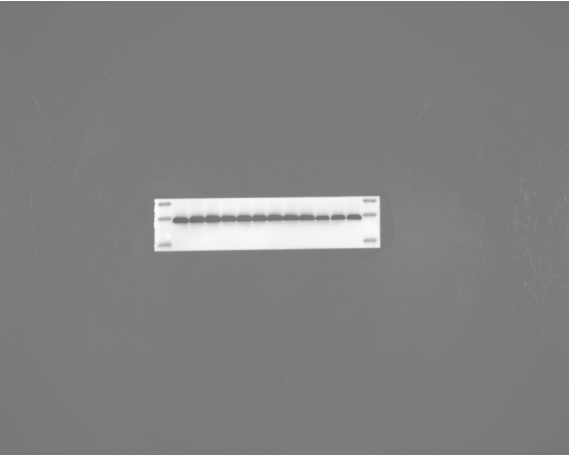

**Tubulin\_gel 1**

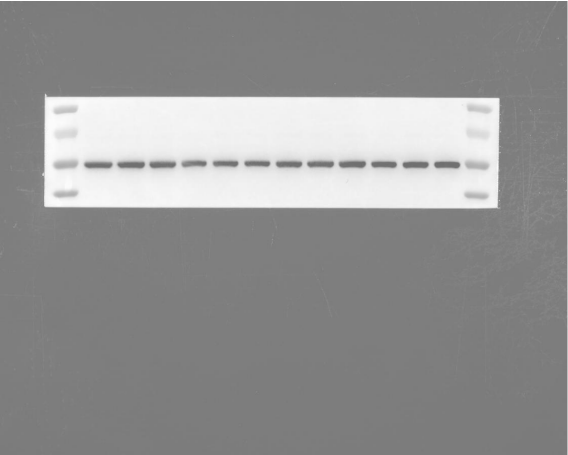

**NDUFV2\_gel 2**

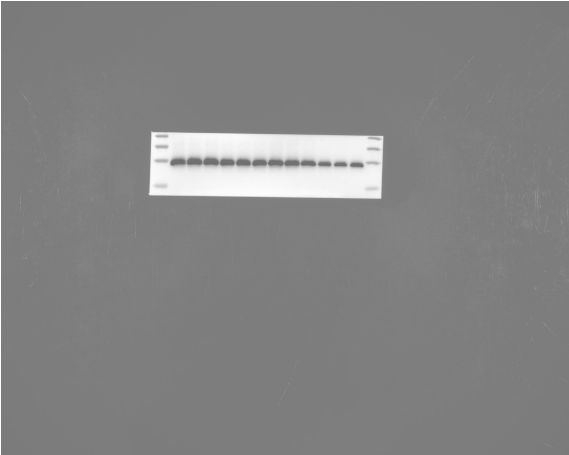

**Tubulin\_gel 2**

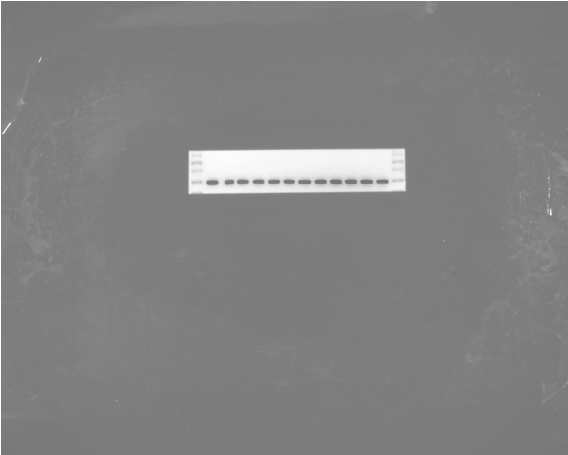

**NRCM**

**NDUFV2\_gel 1**

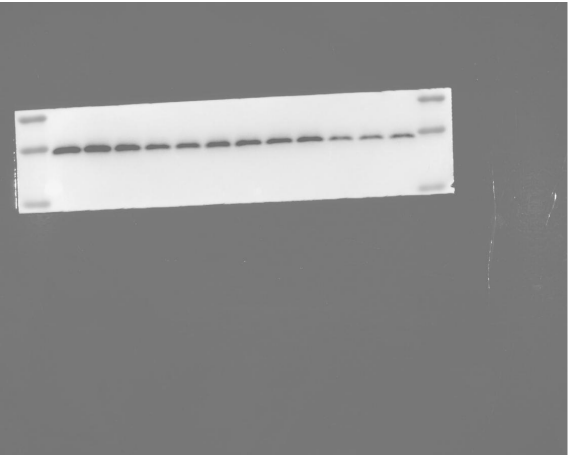

**Tubulin\_gel 1**

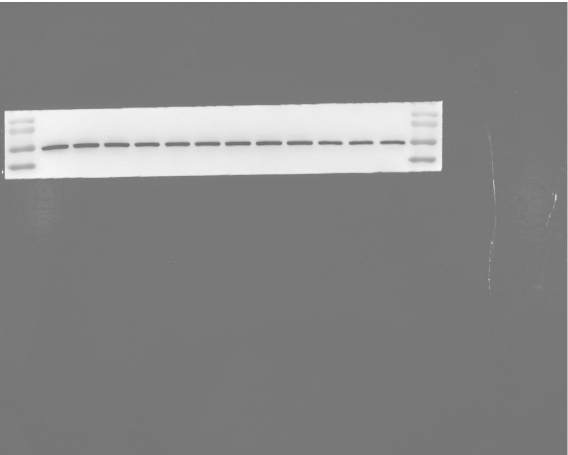

**NDUFV2\_gel 2**

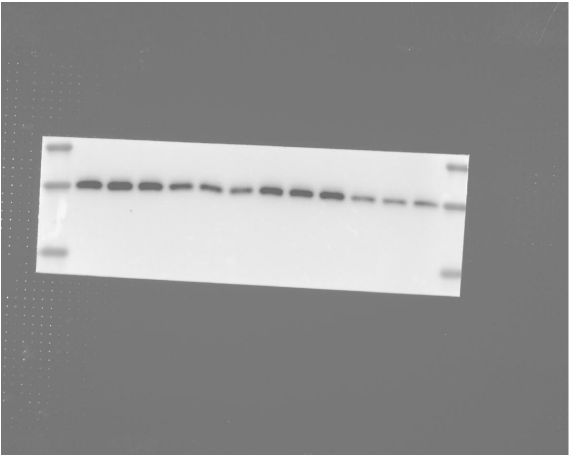

**Tubulin\_gel 2**

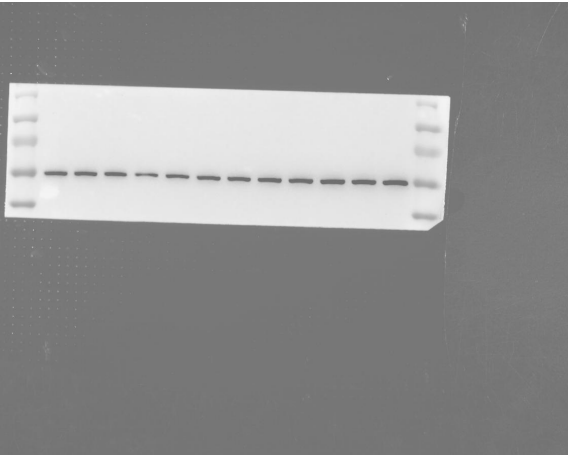

**Figure 7A**

**adPHB2**

**PHB2**

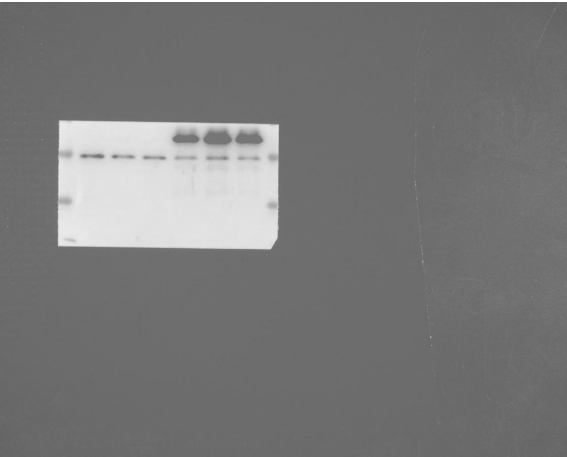

**Tubulin**

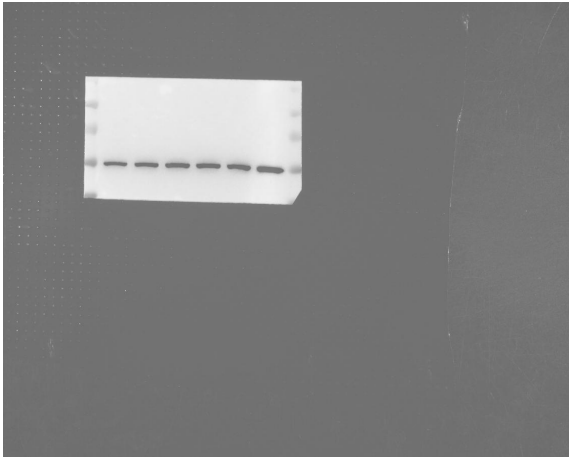

**shNDUFV2**

**NDUFV2**

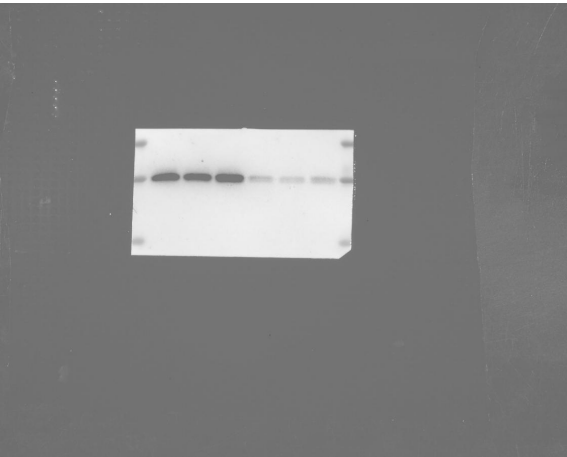

**Tubulin**

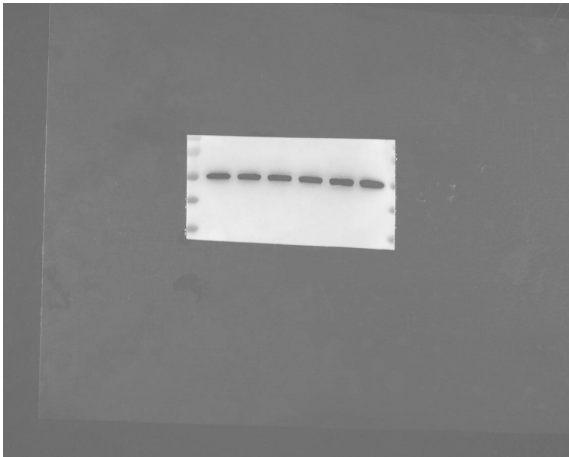



**Figure 7L**

**FIS1\_gel 1**

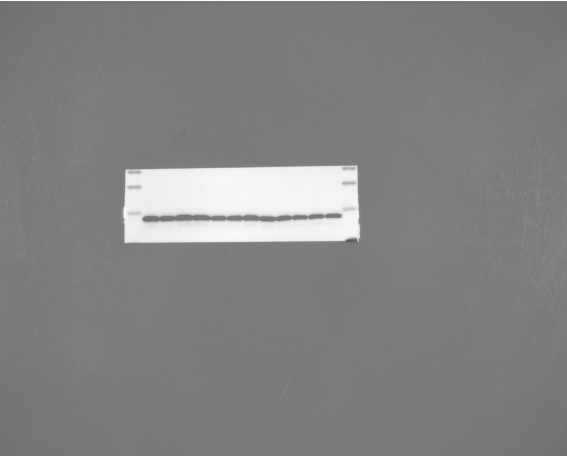

**Tubulin\_FIS1\_gel 1**

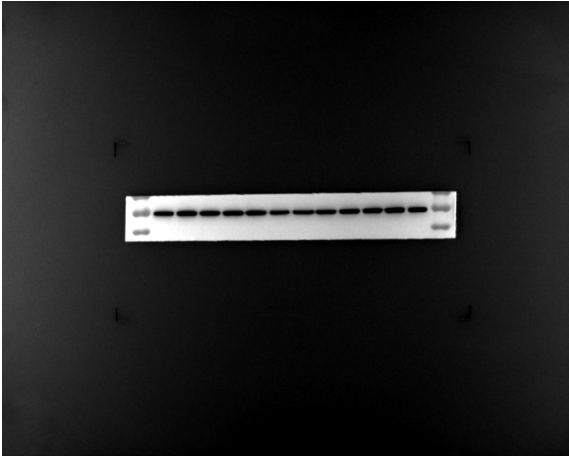

**OPA1\_gel 1**

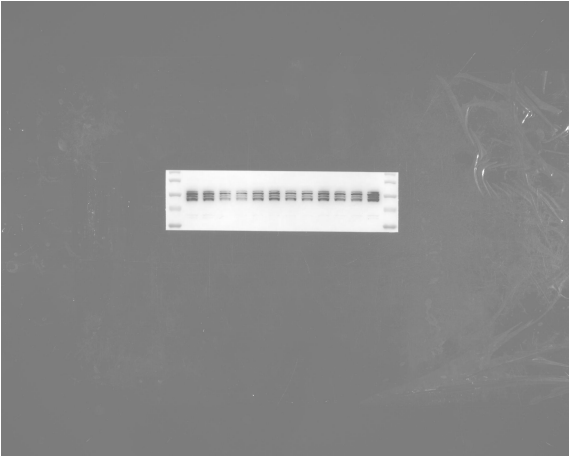

**Tubulin\_OPA1\_gel 1**

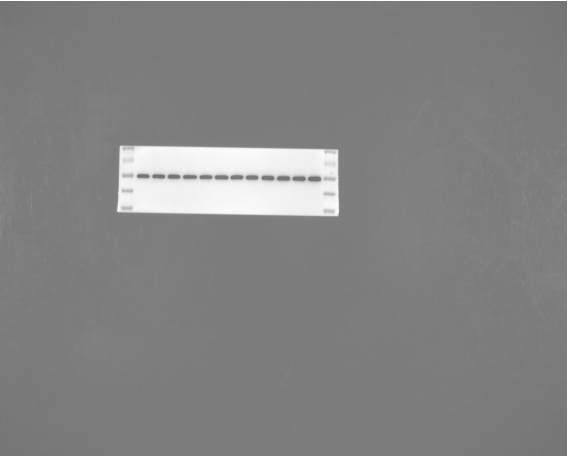

**MFN2\_gel 1**

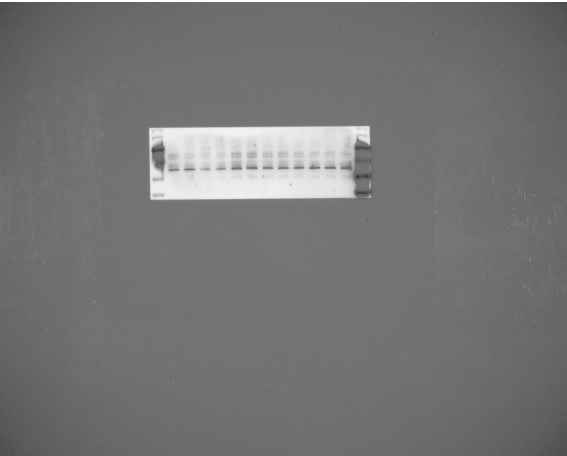

**Tubulin\_MFN2\_gel 1**

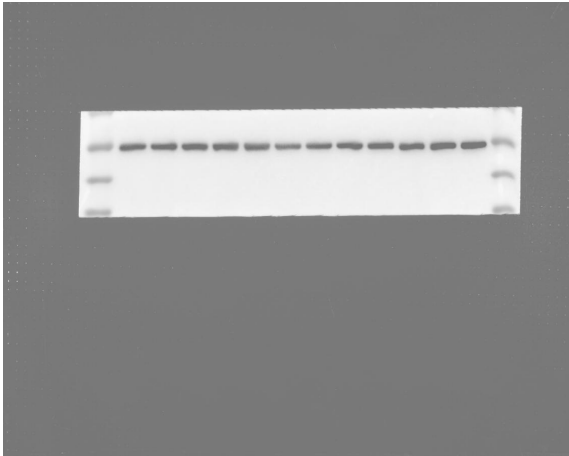

**Figure 7L**

**FIS1\_gel 2**

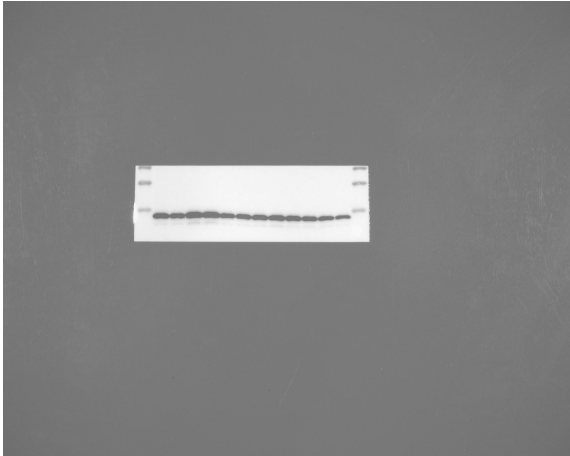

**OPA1\_gel 2**

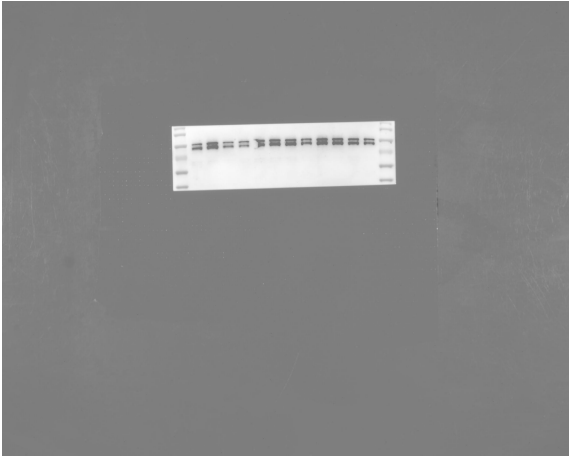

**MFN2\_gel 2**

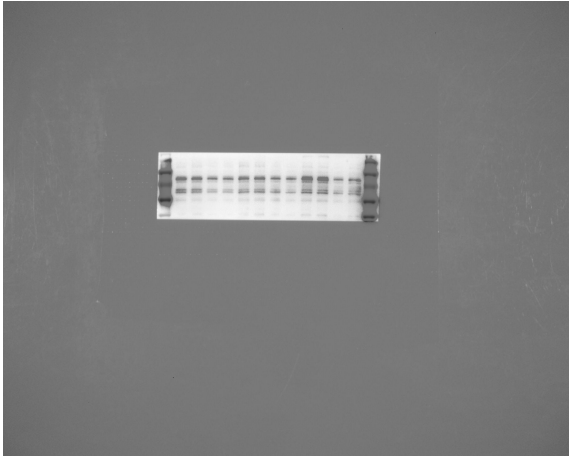

**Tubulin\_gel 2**

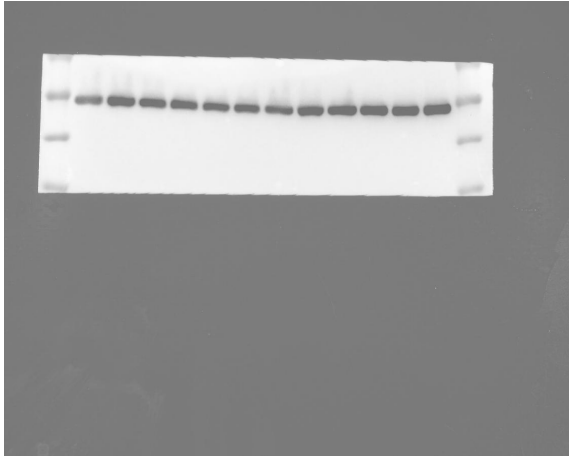

**Figure 8A**

**NDUFV2\_gel 1**

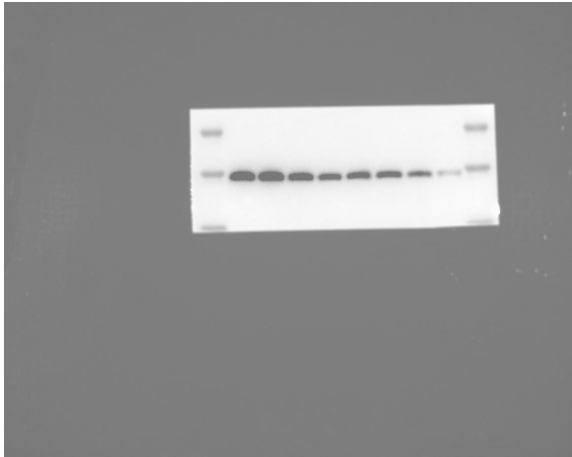

**Tubulin\_gel 1**

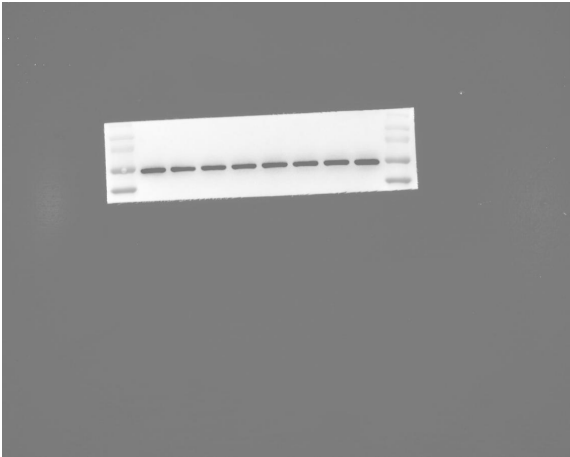

**NDUFV2\_gel 2**

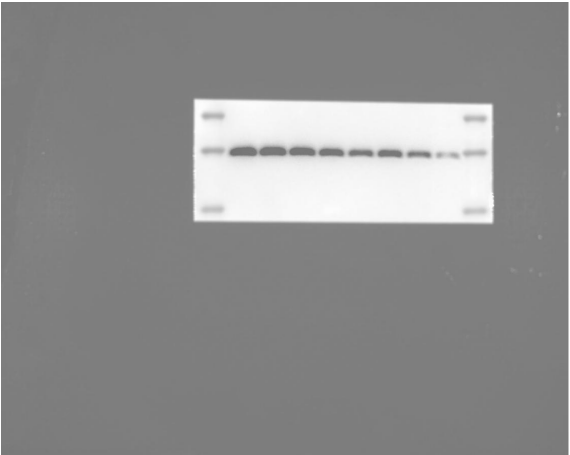

**Tubulin\_gel 2**

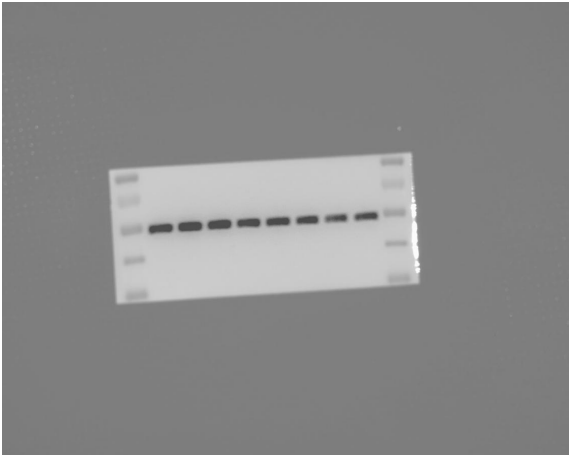

**NDUFV2\_gel 3**

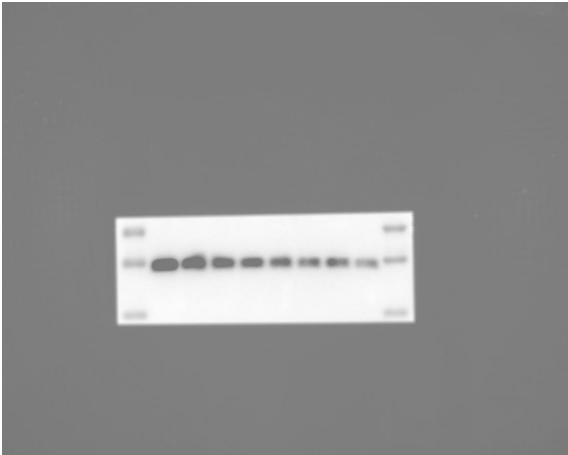

**Tubulin\_gel 3**

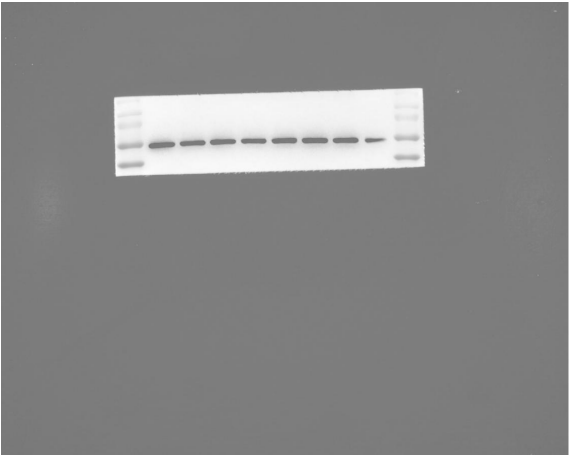

**Figure 8C**

**NDUFV2**

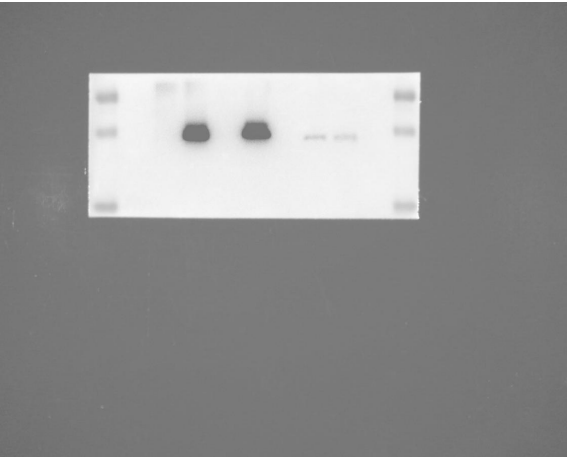

**AFG3L2**

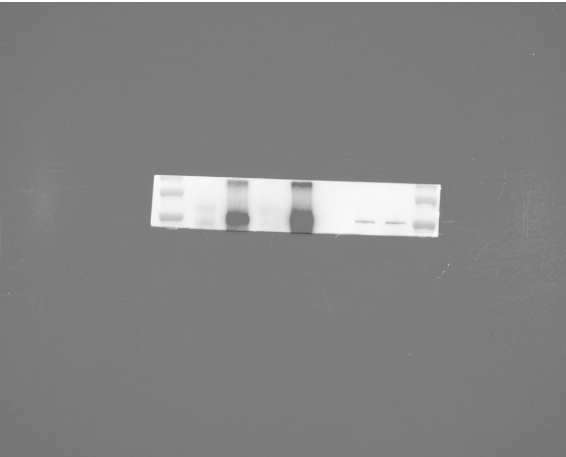

Figure 8D\_shPHB2+shAFG3L2

AFG3L2

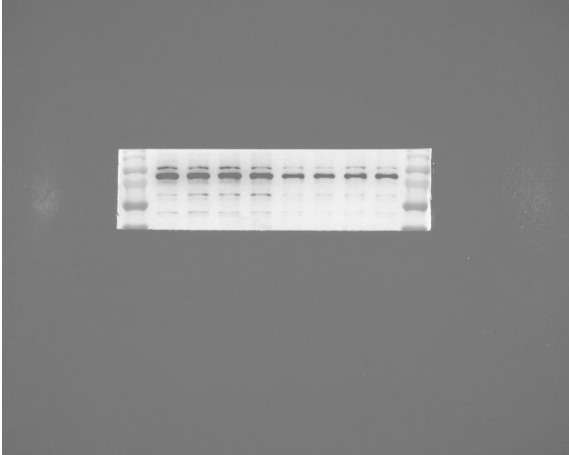

NDUFV2\_gel 1

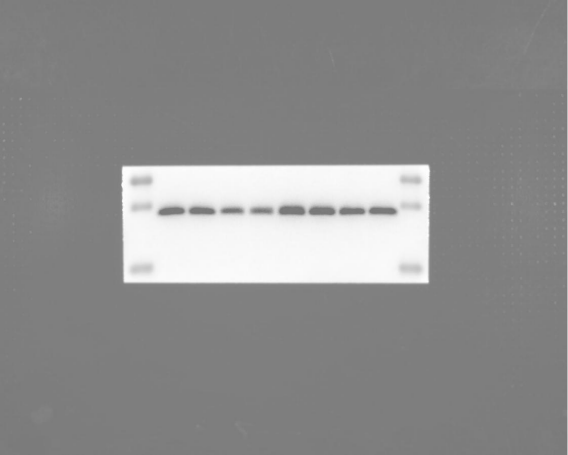

Tubulin\_gel 1

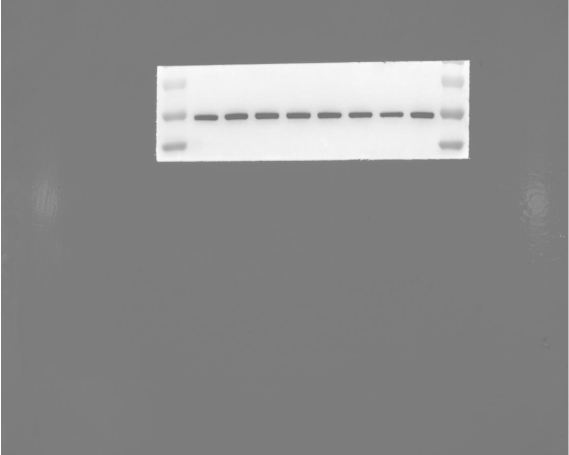

NDUFV2\_gel 2

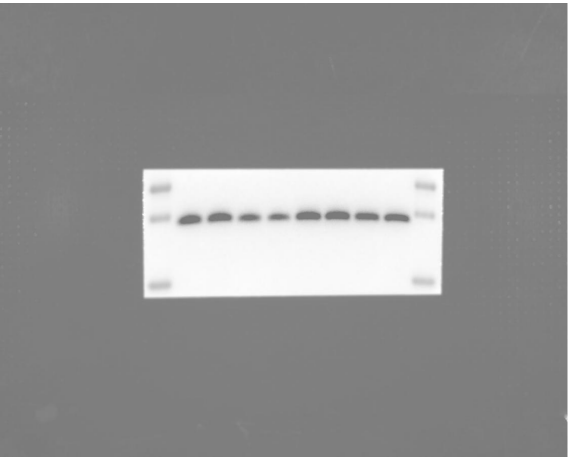

Tubulin\_gel 2

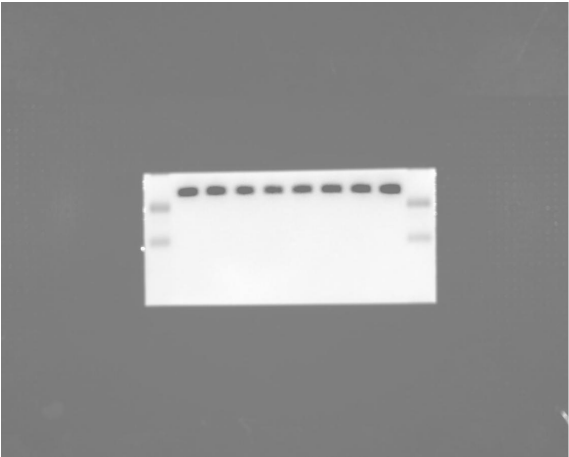

Figure 8D\_shPHB2+shYME1L1

YME1L1

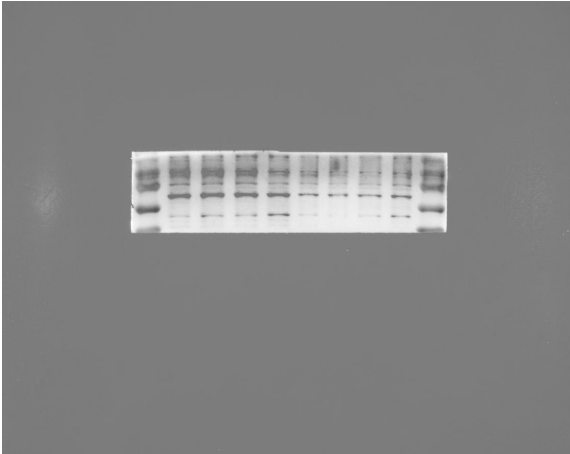

NDUFV2\_gel 1

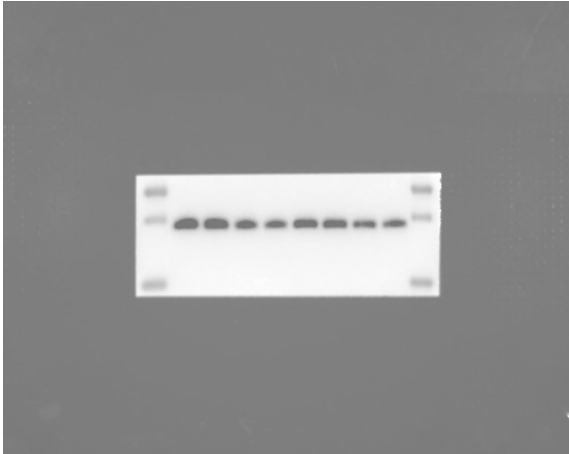

Tubulin\_gel 1

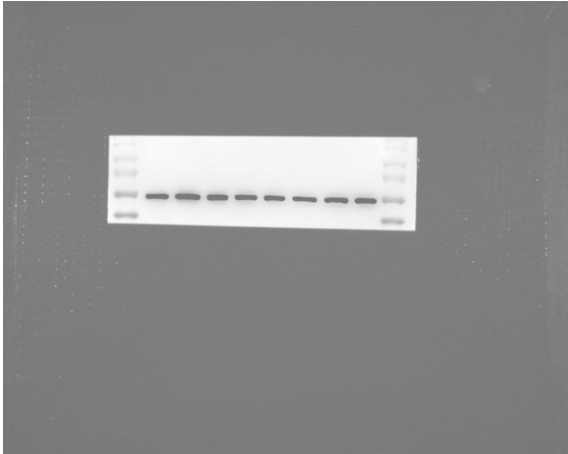

NDUFV2\_gel 2

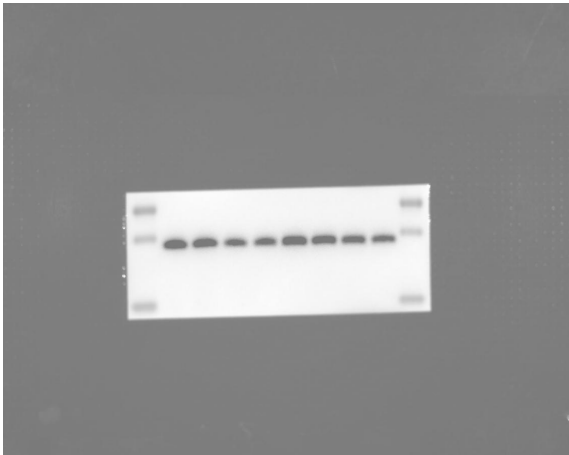

Tubulin\_gel 2

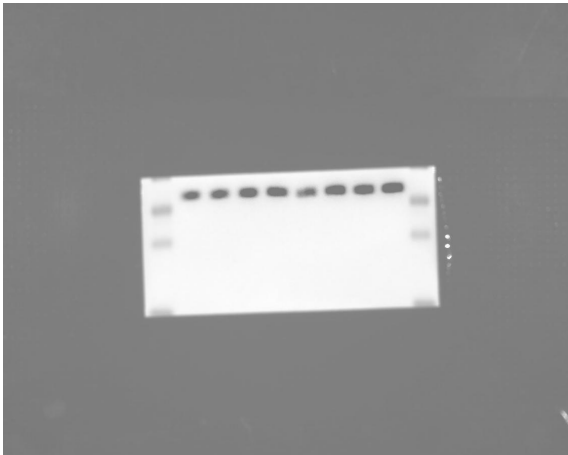

Supplement: mmc2.pdf [file mmc2.pdf]
